# Supplementary material for: Facet-dependent Bi2MoO6 for highly efficient photocatalytic selective oxidation of sp3 C–H bonds using O2 as an oxidant
Source: Royal Society of Chemistry journal article supplement (doi:10.1039/d3cy00018d), 2023-01-01
Supplement: d3cy00018d1.pdf [file d3cy00018d1.pdf]

## **Facet-dependent Bi<sub>2</sub>MoO<sub>6</sub> for highly efficient photocatalytic selective oxidation of sp<sup>3</sup> C-H bonds using O<sub>2</sub> as the oxidant**

Xiaojing Yang,<sup>\*a</sup> Xinju Li,<sup>b</sup> Bao Zhang,<sup>c</sup> Taifeng Liu,<sup>d</sup> Zhenpan Chen,<sup>\*b</sup>

<sup>a</sup> Key Laboratory of Natural Medicine and Immune-Engineering of Henan Province, Henan University, Kaifeng 475004, China; Email: xiaojingyang27@163.com

<sup>b</sup> School of Chemical Engineering, Xiangtan University, Xiangtan, 411105, PR China; Email: zpchen@xtu.edu.cn

<sup>c</sup> Key Lab for Special Functional Materials, Ministry of Education, National & Local Joint Engineering Research Center for High-efficiency Display and Lighting Technology, School of Materials Science and Engineering, and Collaborative Innovation Center of Nano Functional Materials and Applications, Henan University, Kaifeng 475004, China

<sup>d</sup> National & Local Joint Engineering Research Center for Applied Technology of Hybrid Nanomaterials, Henan University, Kaifeng 475004, China

## 1. Experimental sections

### 1.1 Synthesis of $\text{Bi}_2\text{MoO}_6$ samples

A total of 5 mmol bismuth nitrate pentahydrate (Tianjin Kermel Chemical Reagent Co., Ltd.) and 0.36 mmol ammonium molybdate tetrahydrate (Alfa Aesar) were completely dissolved in 30 mL ethylene glycol (Shanghai Macklin Biochemical Technology Co., Ltd.) via an ultrasound treatment. Next, 1.8 mmol cetyltrimethylammonium bromide (CTAB, Tianjin Kermel Chemical Reagent Co., Ltd.) was dissolved in 30 mL deionized water via the ultrasound treatment, and was mixed in the abovementioned solution under vigorous stirring. The pH of the mixture was adjusted between 9 and 6 using an ammonia solution (Luoyang Haohua Chemical Reagent Co., Ltd.). The mixed solution was transferred to a 100 mL Teflon-lined stainless steel autoclave and heated at 180 °C for 48 h. The as-prepared catalyst was centrifuged and washed with water and ethanol three times and dried at 70 °C in an oven. The as-prepared samples synthesized at 9 and 6 were denoted  $\text{Bi}_2\text{MoO}_6$ -(010) and  $\text{Bi}_2\text{MoO}_6$ -(001), respectively.

### 1.2 Characterization of $\text{Bi}_2\text{MoO}_6$ samples

The morphology of the  $\text{Bi}_2\text{MoO}_6$  samples was analyzed through transmission electron microscopy (TEM; FEI Talos F200S) and scanning electron microscopy (SEM, Hitachi Regulus 8100). The bulk structure of the  $\text{Bi}_2\text{MoO}_6$  samples was investigated by X-ray diffraction (XRD; Rigaku Ultima IV). The optical absorption of the  $\text{Bi}_2\text{MoO}_6$  samples was analyzed by UV-visible diffuse reflectance spectroscopy (Shimadzu UV-3600i Plus). The oxygen vacancies on the surface of the  $\text{Bi}_2\text{MoO}_6$  samples were determined via the electron spin resonance (ESR) technique (CIQTEK EPR200 Plus). The reactive oxygen species in the photocatalytic oxidation of toluene was detected via the electron spin resonance technique (Bruker EMXplus-6/1). The surface chemical composition of bismuth molybdate samples was determined by X-ray photoelectron spectroscopy (XPS, Shimadzu/Krayos AXIS Ultra DLD). The electrochemical properties of the  $\text{Bi}_2\text{MoO}_6$  samples were analyzed at normal temperature and pressure via a self-made three electrode system and CHEI660 electrochemical workstation. The reference electrode was  $\text{Hg}/\text{Hg}_2\text{SO}_4$ , and the counter electrode was Pt net. The working electrode was prepared using the as-prepared bismuth molybdate catalyst according to the following reaction process. One drop of Triton-100 was added to 50 mg of the bismuth molybdate catalyst, and three drops of water were ground to form a slurry-like mixed solution. Next, the photocatalyst was attached to the F-doped tin oxide (FTO) electrode by scraping and finally pyrolyzed for 1 h in a muffle furnace at 350 °C.

### 1.3 Performance of $\text{Bi}_2\text{MoO}_6$ samples

The experiment of selective oxidation of hydrocarbons over the photocatalyst was carried out in a home-made photocatalyst reactor. Considering the toluene (Luoyang Haohua Chemical Reagent Co., Ltd.) as an example, 1.5 ml of toluene containing 0.1 mmol of internal standard m-dichlorobenzene (Shanghai Macklin Biochemical

Technology Co., Ltd.) and 40 mg of bismuth molybdate photocatalyst were added to the reactor. The reactor was connected to a O<sub>2</sub> balloon with 1 bar pressure. The reaction temperature was precisely controlled at 25 °C through the connected circulating water. Under dark conditions, the mixed solution was magnetically stirred for 0.5 h. The light source of the reaction was a Xe lamp of 300 W (Beijing Perfect Light Company, China). The photocatalytic reaction was carried out under the radiation of the Xe lamp. When the reaction was completed, the solid catalyst in the reaction was removed by centrifugation. The remaining reaction solution was injected into a gas chromatography system (Agilent gas chromatography, column HP-5, argon, column temperature 120 °C). The amount of benzyl alcohol and benzaldehyde generated by the internal standard and the selectivity of benzaldehyde were calculated. Similar reaction conditions were used for recycling experiments, and reactions with different substrates.

The controlled experiments without light, a photocatalyst, or dioxygen were carried out. Other conditions were identical to those used in the aforementioned photocatalytic reaction.

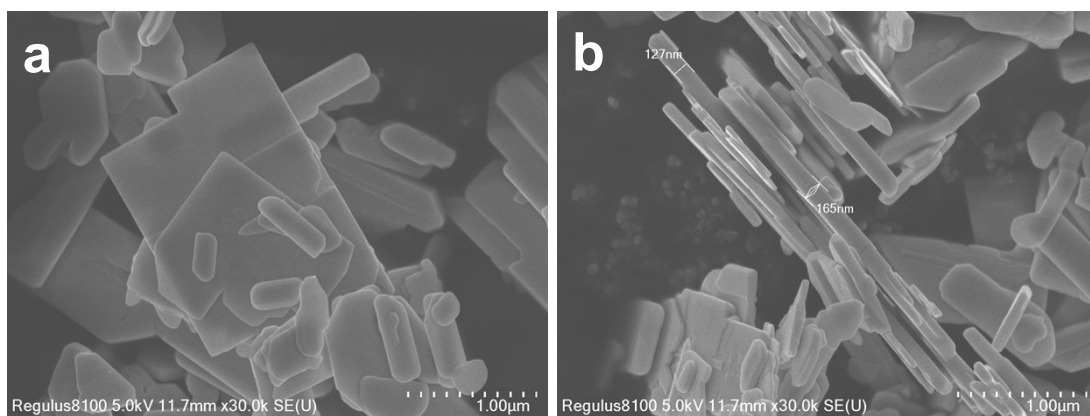

**Fig. S1** SEM images of the  $\text{Bi}_2\text{MoO}_6$ -(010) sample. (a) Frontal view. (b) Side view.

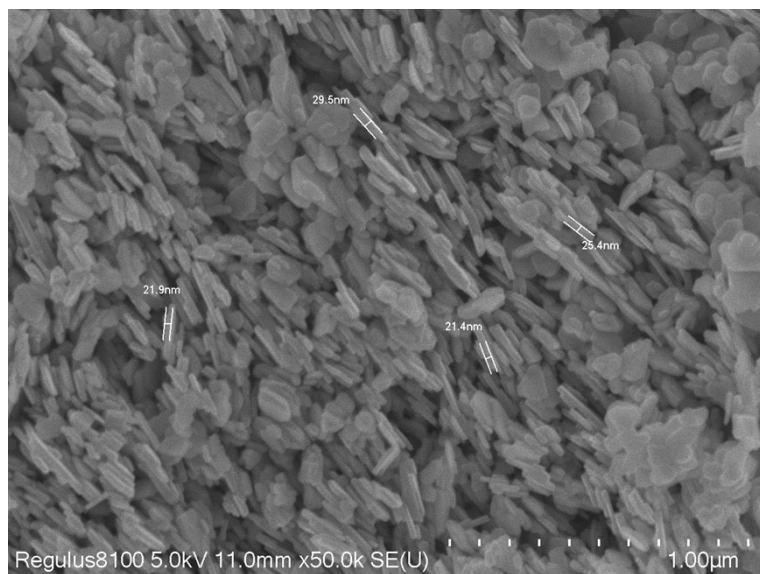

**Fig. S2** SEM images of the Bi<sub>2</sub>MoO<sub>6</sub>-(001) sample

**Table S1** Black experiments

| Entry | Photocatalyst | Light | O <sub>2</sub> | Photoactivity<br>( $\mu$ mol) | Selectivity<br>(%) |
|-------|---------------|-------|----------------|-------------------------------|--------------------|
| 1     | +             | +     | +              | 75                            | 98                 |
| 2     | -             | +     | +              | -                             | -                  |
| 3     | +             | -     | +              | -                             | -                  |
| 4     | +             | +     | -              | -                             | -                  |

Reaction conditions: Bi<sub>2</sub>MoO<sub>6</sub>-(010) catalyst, 40 mg; toluene, 1.5 mL; internal standard, m-dichlorobenzene; reaction time, 5 h; Xe lamp.

**Table S2** Comparison with activity and selectivity of photocatalysts reported in the literature

| References | Photocatalyst                                                                                | Mass of photocatalyst (mg) | Substrate                        | Light              | Production rate ( $\mu\text{mol g}^{-1} \text{h}^{-1}$ ) | Sel. (%) |
|------------|----------------------------------------------------------------------------------------------|----------------------------|----------------------------------|--------------------|----------------------------------------------------------|----------|
| 1          | CdIn <sub>2</sub> S <sub>4</sub> -CdS-140                                                    | 10                         | 47.2 $\mu\text{mol}$ toluene     | Visible light      | 631.7                                                    | 98.8     |
| 2          | BMOT-10                                                                                      | 50                         | 10 mmol toluene                  | Visible light      | 1036.8                                                   | 97.2     |
| 3          | Cs <sub>3</sub> Bi <sub>2</sub> Br <sub>9</sub> /SBA-15                                      | 10                         | 5 mL toluene                     | Visible light      | 12600                                                    | 90       |
| 4          | WO <sub>3</sub> (10.3)/TiO <sub>2</sub>                                                      | 5                          | 0.05 mmol toluene                | $\lambda > 300$ nm | 169.4                                                    | 50       |
| 5          | CdS                                                                                          | 8                          | 0.1 mmol toluene                 | Visible light      | 412.5                                                    | 100      |
| 6          | CPB/Ti-180Cl                                                                                 | 15                         | 5 mL toluene                     | Visible light      | 1874                                                     | 81.1     |
| 7          | Pd/Bi <sub>2</sub> WO <sub>6</sub> -4                                                        | 50                         | 1 mL toluene                     | $\lambda > 400$ nm | 1140                                                     | 90       |
| 8          | CdS-150                                                                                      | 10                         | 50 $\mu\text{mol}$ toluene       | Visible light      | 1727.5                                                   | 97.3     |
| 9          | Fe(0.26)-BWO                                                                                 | 20                         | 10 mmol toluene                  | Visible light      | 1303.8                                                   | 96.8     |
| 10         | Pd/BiOBr                                                                                     | 5                          | 0.05 mmol toluene                | Visible light      | 476.8                                                    | 99       |
| 11         | Pd/BiVO <sub>4</sub>                                                                         | 10                         | 1 mL toluene                     | Visible light      | 94.6                                                     | >90      |
| 12         | 3-1BiMO                                                                                      | 50                         | 1 mmol toluene                   | Visible light      | 778                                                      | 96       |
| 13         | W <sub>18</sub> O <sub>49</sub>                                                              | 5                          | 10 mL toluene                    | Visible light      | 410                                                      | 92       |
| 14         | Cs <sub>3</sub> Sb <sub>2</sub> Br <sub>9</sub> /g-C <sub>3</sub> N <sub>4</sub>             | 2.5                        | 5 mL toluene                     | Visible light      | 8346.8                                                   | 81.1     |
| 15         | Nb <sub>2</sub> O <sub>5</sub>                                                               | 25                         | 2 mL toluene                     | $\lambda > 390$ nm | 240                                                      | 98       |
| 16         | Bi <sub>2</sub> MoO <sub>6</sub> -Bi <sub>2</sub> Mo <sub>3</sub> O <sub>12</sub> composites | 100                        | 1 mmol toluene                   | Visible light      | 508                                                      | 98.5     |
| 17         | 4CD/BiMO                                                                                     | 20                         | 350 $\mu\text{mol}$ ethylbenzene | Visible light      | 415.6                                                    | -        |
| 18         | CdS-ZnS                                                                                      | 50                         | 10 mmol toluene                  | Visible light      | 1078                                                     | 98       |
| 19         | BiOCl/BiCl <sub>3</sub> Br-CTA                                                               | 20                         | 0.2 mmol                         | Visible            | 527                                                      | 99       |

|            |                                                                     |     |                      |                  |        |     |
|------------|---------------------------------------------------------------------|-----|----------------------|------------------|--------|-----|
| 20         | FLP-FLCN                                                            | 10  | 0.25 mmol<br>toluene | Visible<br>light | 82 600 | 96  |
| 21         | Cs <sub>3</sub> Bi <sub>1.8</sub> Sb <sub>0.2</sub> Br <sub>9</sub> | 10  | 5 mL toluene         | Visible<br>light | 5830   | 70  |
| 22         | Bi <sub>2</sub> MoO <sub>6</sub> /g-C <sub>3</sub> N <sub>4</sub>   | 50  | 1 mL toluene         | Visible<br>light | 850.7  | 99  |
| 23         | TiO <sub>2</sub>                                                    | 100 | 0.01 mL<br>toluene   | UV<br>lamp       | 9.46   | 90  |
| 24         | Ni-doped CdS                                                        | 80  | 0.5 mmol<br>toluene  | Visible<br>light | 216.7  | 100 |
| This study | Bi <sub>2</sub> MoO <sub>6</sub> -(010)                             | 40  | 1.5 mL toluene       | Visible<br>light | 375    | 96  |

1. Y.-X. Tan, Z.-M. Chai, B.-H. Wang, S. Tian, X.-X. Deng, Z.-J. Bai, L. Chen, S. Shen, J.-K. Guo, M.-Q. Cai, C.-T. Au and S.-F. Yin, *ACS Catal.*, 2021, **11**, 2492-2503.
2. L.-N. Song, F. Ding, Y.-K. Yang, D. Ding, L. Chen, C.-T. Au and S.-F. Yin, *ACS Sustainable Chem. Eng.*, 2018, **6**, 17044-17050.
3. Y. Dai, C. Poidevin, C. Ochoa-Hernandez, A. A. Auer and H. Tuysuz, *Angew. Chem. Int. Ed.*, 2020, **59**, 5788-5796.
4. D. Tsukamoto, Y. Shiraishi and T. Hirai, *Catal. Sci. Tech.*, 2013, **3**, 2270-2277.
5. Y. H. Zhang, N. Zhang, Z.-R. Tang and Y.-J. Xu, *Chem. Sci.*, 2012, **3**, 2812-2822.
6. Y. Zhao, Y. Dai, Q. Wang, Y. Dong, T. Song, A. Mudryi, Q. Chen and Y. Li, *ChemCatChem*, 2021, **13**, 2592-2598.
7. B. Yuan, B. Zhang, Z. Wang, S. Lu, J. Li, Y. Liu and C. Li, *Chin. J. Catal.*, 2017, **38**, 440-446.
8. Z.-M. Chai, B.-H. Wang, Y.-X. Tan, Z.-J. Bai, J.-B. Pan, L. Chen, S. Shen, J.-K. Guo, T.-L. Xie, C.-T. Au and S.-F. Yin, *Ind. Eng. Chem. Res.*, 2021, **60**, 11106-11116.
9. X.-X. Deng, S. Tian, Z.-M. Chai, Z.-J. Bai, Y.-X. Tan, L. Chen, J.-K. Guo, S. Shen, M.-Q. Cai, C.-T. Au and S.-F. Yin, *Ind. Eng. Chem. Res.*, 2020, **59**, 13528-13538.
10. X. L. Li, T. Wang, X. Q. Tao, G. H. Qiu, C. Li and B. X. Li, *J. Mater. Chem. A*, 2020, **8**, 17657-17669.
11. S. Okunaka, H. Tokudome and Y. Hitomi, *J. Catal.*, 2020, **391**, 480-484.
12. K. Cai, S.-Y. Lv, L.-N. Song, L. Chen, J. He, P. Chen, C.-T. Au and S.-F. Yin, *J. Solid. State. Chem.*, 2019, **269**, 145-150.
13. H. Bai, W. Yi, J. Liu, Q. Lv, Q. Zhang, Q. Ma, H. Yang and G. Xi, *Nanoscale*, 2016, **8**, 13545-13551.
14. H.-H. Zhang, Z.-C. Zhou, Y.-J. Dong, L. Zhang, H.-Y. Chen and D.-B. Kuang, *Solar RRL*, 2021, **5**, 2100559.
15. K. Tamai, K. Murakami, S. Hosokawa, H. Asakura, K. Teramura and T. Tanaka, *J. Phys. Chem. C*, 2017, **121**, 22854-22861.
16. L. N. Song, L. Chen, J. He, P. Chen, H. K. Zeng, C.-T. Au and S.-F. Yin, *Chem. Commun.*, 2017, **53**, 6480-6483.
17. S. Samanta, S. Khilari and R. Srivastava, *ACS Appl. Nano. Mater.*, 2017, **1**, 426-441.
18. F. Liu, C.-X. Xiao, L.-H. Meng, L. Chen, Q. Zhang, J.-B. Liu, S. Shen, J.-K. Guo, C.-T. Au and S.-F. Yin, *ACS Sustainable Chem. Eng.*, 2020, **8**, 1302-1310.
19. G. H. Qiu, T. Wang, X. L. Li, X. Q. Tao and B. X. Li, *Ind. Eng. Chem. Res.*, 2020, **59**, 11517-11526.



20. S. K. Pahari and R.-A. Doong, *ACS Sustainable Chem. Eng.*, 2020, **8**, 13342-13351.
21. Z.-J. Bai, X.-P. Tan, L. Chen, B. Hu, Y.-X. Tan, Y. Mao, S. Shen, J.-K. Guo, C.-T. Au, Z.-W. Liang and S.-F. Yin, *Chem. Eng. Sci.*, 2022, **247**, 116983.
22. F. Ding, P. Chen, F. Liu, L. Chen, J.-K. Guo, S. Shen, Q. Zhang, L.-H. Meng, C.-T. Au and S.-F. Yin, *Appl. Surf. Sci.*, 2019, **490**, 102-108.
23. F.-L. Cao, J.-G. Wang, F.-J. Lv, D.-Q. Zhang, Y.-N. Huo, G.-S. Li, H.-X. Li and J. Zhu, *Catal. Commun.*, 2011, **12**, 946-950.
24. H. She, L. Li, H. Zhou, L. Wang, J. Huang and Q. Wang, *Front. Chem.*, 2018, **6**, 466.

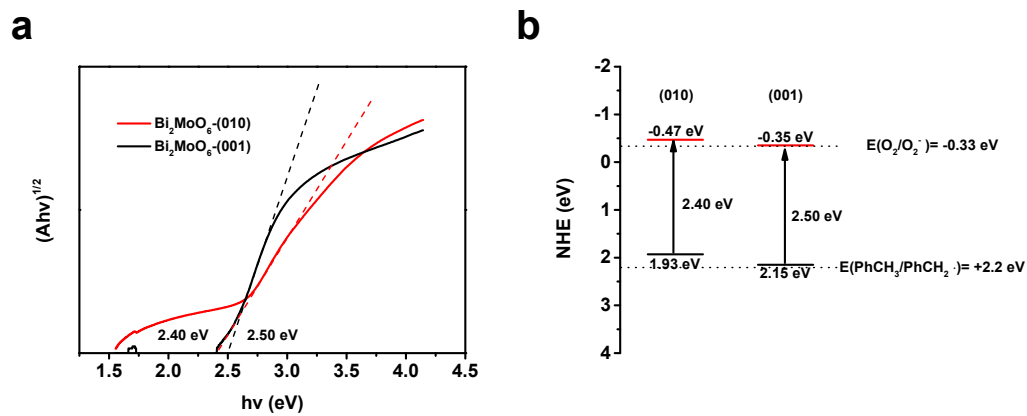

**Fig. S3** (a) Tauc plots and (b) energy band structures of the  $\text{Bi}_2\text{MoO}_6$  samples.

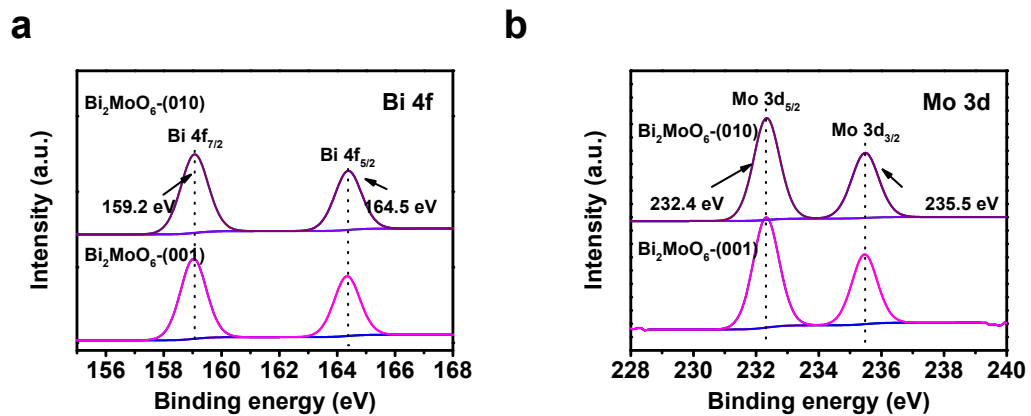

**Fig. S4** Bi 4f, Mo 3d, and O1s of XPS profiles of  $\text{Bi}_2\text{MoO}_6$ -(010) and  $\text{Bi}_2\text{MoO}_6$ -(001) samples.

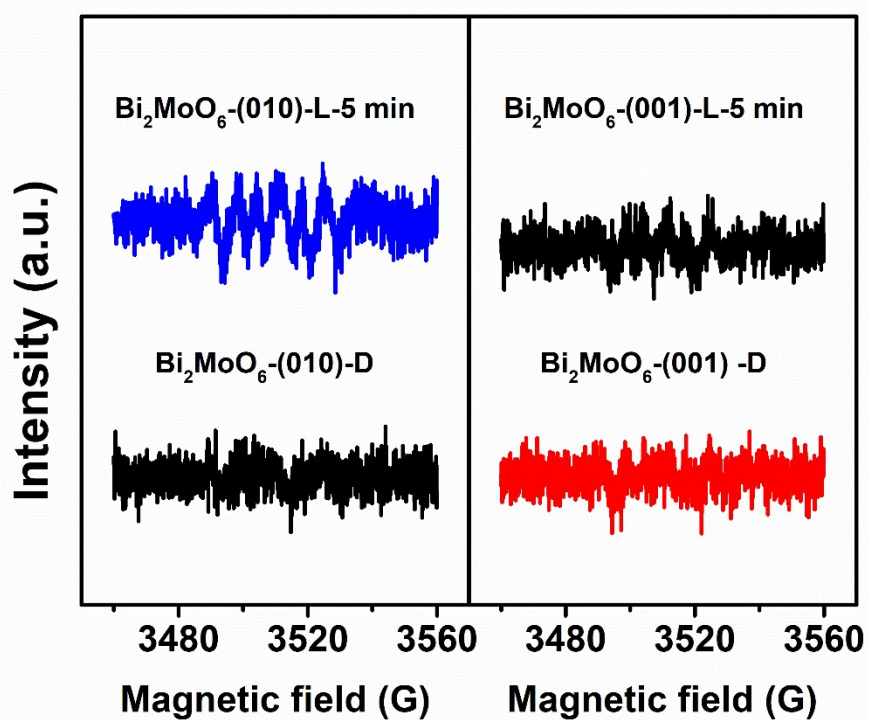

**Fig. S5** ESR profile of the reactive oxygen species captured by DMPO over the Bi<sub>2</sub>MoO<sub>6</sub> samples. The signals obtained under dark and visible light irradiation at 5 mins are denoted as D and L-5 min, respectively.

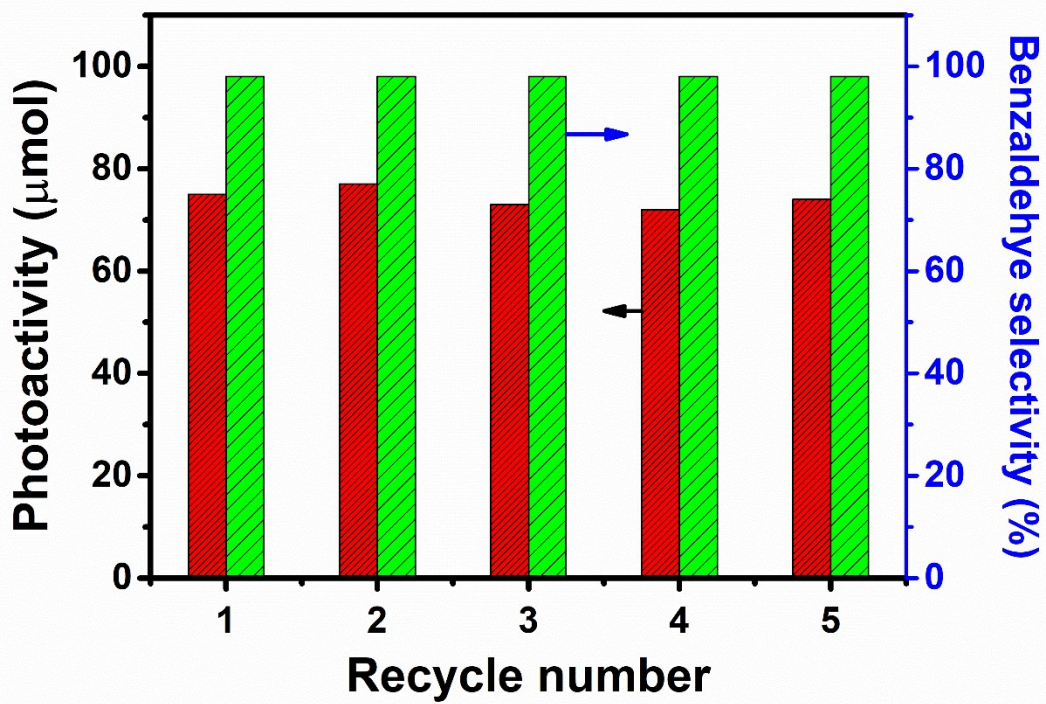

**Fig. S6** Recycling experiment of the photocatalytic oxidation of toluene over the  $\text{Bi}_2\text{MoO}_6$ -(010) catalyst.

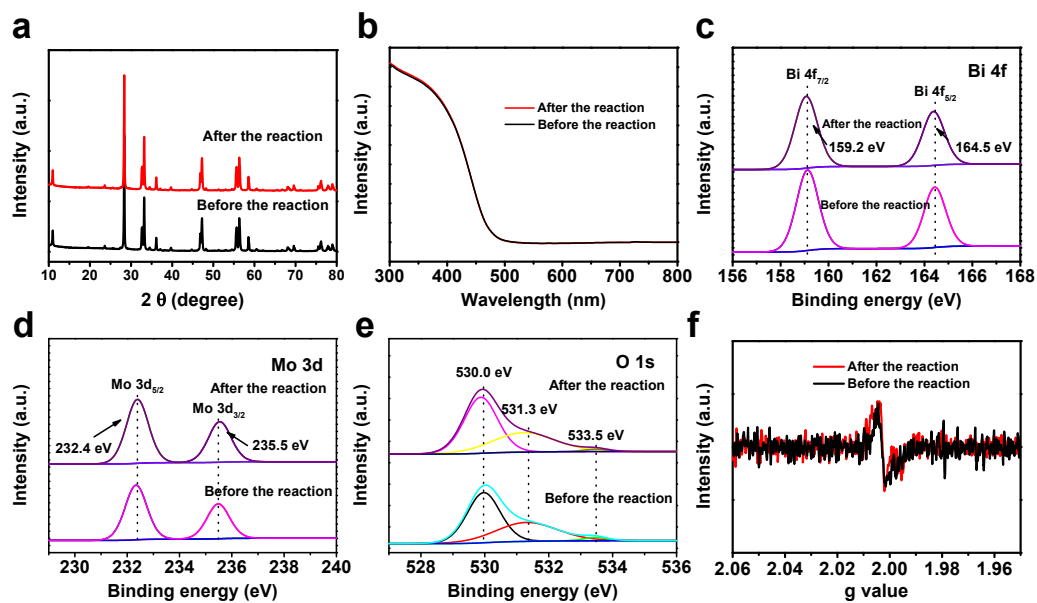

**Fig. S7** Characterization of  $\text{Bi}_2\text{MoO}_6\text{-(010)}$  before and after the photocatalytic reaction. (a) XRD patterns of  $\text{Bi}_2\text{MoO}_6\text{-(010)}$  before and after the photocatalytic reaction. (b) UV-visible DRS profile of  $\text{Bi}_2\text{MoO}_6\text{-(010)}$  before and after the photocatalytic reaction. (c–e) Bi 4f, Mo 3d, and O1s XPS profiles of  $\text{Bi}_2\text{MoO}_6\text{-(010)}$  before and after the photocatalytic reaction. (f) ESR profile of  $\text{Bi}_2\text{MoO}_6\text{-(010)}$  before and after the photocatalytic reaction.

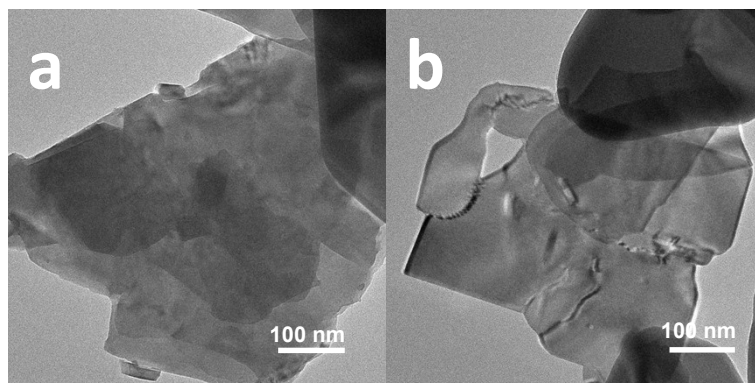

**Fig. S8** TEM images of Bi<sub>2</sub>MoO<sub>6</sub>-(010) (a) before and (b) after the photocatalytic reaction.
